# Supplementary material for: Manipulating or Superseding Host Recombination Functions: A Dilemma That Shapes Phage Evolvability
Source: PLoS Genet. 2013 Sep 26;9(9):e1003825. doi: 10.1371/journal.pgen.1003825 (PMC3784561; doi:10.1371/journal.pgen.1003825)
Supplement: Table S6 — Description of lambdoid phages and prophages. For each phage (ph) or prophage (pro) used for the analysis, the RefSeq ID of the host genome is given for prophages and the RefSed ID is given for phage genomes directly. The recombinase family (Redβ, ERF, Sak, Sak4 and Gp2.5) is indicated in the “Rec” column. The type of RecBCD inhibitor (Gam or Abc2) is indicated in the “Inh” column. The expected number of Chi sites is given for the tri-nucleotides model (M2). For each genome, Chi composition significantly different from random expectation is given by the “pvalue (Z score)” column. The GC content of each phage or prophage genome is given in the “GC” column. (XLS) [file pgen.1003825.s007.xls]

## Sheet: Feuil1
Type	Host Name	RefSeq ID	Rec	Inh	Chi	Chi	pvalue	Size (bp)	GC
					Observed	Expected	(Z score)
pro	E. coli HS	NC_009800	RedB	-	0	2.128	0.24	43215	0.48
pro	E. coli O55:H7 str. CB9615	NC_013941	RedB	Gam	0	2.978	0.1	47108	0.5
pro	E. coli UMNK88	CP002729	-	-	12	2.708	<0.0001	38813	0.5
pro	E. coli ETEC H10407	FN649414	-	no	13	2.580	<0.0001	39238	0.5
pro	E. fergusonii ATCC 35469	NC_011740	RedB	Gam	4	3.466	0.91	54659	0.48
pro	S. enterica subsp. enterica serovar Choleraesuis str. SC-B67	NC_006905	Sak	-	0	2.047	0.26	41689	0.48
pro	S. enterica subsp. enterica serovar Heidelberg str. SL476	NC_011083	ERF	Abc2	0	1.993	0.27	41339	0.48
pro	S. enterica subsp. enterica serovar Paratyphi A str. ATCC 9150	NC_006511	Sak	Abc2	0	1.881	0.31	40803	0.47
pro	S. enterica subsp. enterica serovar Typhimurium str. D23580	FN424405	Sak	Abc2	0	2.131	0.24	41637	0.48
pro	S. enterica subsp. enterica serovar Typhimurium str. T000240	AP011957	Sak	Abc2	0	2.022	0.26	42502	0.48
pro	E. coli IAI39	NC_011750	-	-	3	1.962	0.63	31375	0.49
pro	E. coli UMN026	NC_011751	RedB	Gam	0	2.788	0.12	46057	0.5
pro	E. coli S88	NC_011742	-	-	18	3.794	<0.0001	53541	0.51
pro	E. coli SE11	NC_011415	RedB	Gam	0	2.955	0.1	49870	0.5
pro	E. coli O26:H11 str. 11368	NC_013361	RedB	Gam	0	3.377	0.07	49704	0.51
pro	E. coli O103:H2 str. 12009	NC_013353	-	-	8	3.070	<0.001	45998	0.51
pro	E. coli O55:H7 str. CB9615	NC_013941	RedB	Gam	0	3.069	0.09	47458	0.5
pro	E. coli IHE3034	CP001969	-	-	9	3.578	<0.001	46910	0.51
pro	E. fergusonii ATCC 35469	NC_011740	-	-	16	2.758	<0.0001	40579	0.49
pro	S. enterica subsp. enterica serovar Schwarzengrund str. CVM19633	NC_011094	ERF	Abc2	1	2.575	0.54	48952	0.49
pro	S. enterica subsp. enterica serovar Schwarzengrund str. CVM19633	NC_011094	-	-	11	3.286	<0.001	49103	0.51
pro	S. enterica subsp. enterica serovar Dublin str. CT_02021853	NC_011205	Sak	Abc2	0	1.926	0.29	39968	0.48
pro	E. coli O157:H7 str. Sakai	NC_002695	RedB	-	3	2.438	0.88	37053	0.5
pro	E. coli UMN026	NC_011751	-	-	11	2.576	<0.0001	38426	0.5
pro	E. coli 55989	NC_011748	RedB	Gam	0	3.074	0.09	45510	0.5
pro	E. coli IAI1	NC_011741	RedB	Gam	0	2.984	0.1	47913	0.5
pro	E. coli O157:H7 str. EC4115	NC_011353	RedB	-	3	2.372	0.85	37172	0.5
pro	E. coli O127:H6 str. E2348/69	NC_011601	Sak	Abc2	0	2.920	0.11	50474	0.5
pro	E. coli BL21-Gold(DE3)pLysS AG	NC_012947	RedB	Gam	0	2.461	0.17	38051	0.52
pro	E. coli BL21	NC_012892	RedB	Gam	0	2.911	0.11	41837	0.52
pro	E. coli O26:H11 str. 11368	NC_013361	ERF	Abc2	1	3.032	0.39	52062	0.5
pro	E. coli O157:H7 str. TW14359	NC_013008	RedB	-	3	2.410	0.87	38101	0.5
pro	E. coli O111:H- str. 11128	NC_013364	-	-	0	2.240	0.21	36640	0.51
pro	E. coli O103:H2 str. 12009	NC_013353	-	-	1	2.722	0.49	39319	0.51
pro	E. coli 042	FN554766	RedB	-	3	2.316	0.82	40395	0.5
pro	E. coli O55:H7 str. CB9615	NC_013941	RedB	Gam	3	2.803	0.94	45534	0.49
pro	E. coli UMNF18	CP002890	Sak4	Abc2	0	1.919	0.29	43620	0.47
pro	E. coli ETEC H10407	FN649414	RedB	Gam	3	2.489	0.91	45486	0.48
pro	E. coli O157:H7 str. Sakai	NC_002695	-	-	9	3.574	<0.001	49345	0.51
pro	E. coli O157:H7 EDL933	NC_002655	-	-	8	3.583	0.06	44938	0.52
pro	E. coli 55989	NC_011748	-	-	16	3.811	<0.0001	45190	0.52
pro	E. coli ED1a	NC_011745	-	-	13	3.415	<0.0001	45254	0.53
pro	E. coli O157:H7 str. EC4115	NC_011353	-	-	9	3.659	<0.001	48383	0.52
pro	E. coli O26:H11 str. 11368	NC_013361	-	-	10	3.723	<0.001	48402	0.51
pro	E. coli O26:H11 str. 11368	NC_013361	-	-	9	4.135	0.05	50044	0.52
pro	E. coli O157:H7 str. TW14359	NC_013008	-	-	9	3.595	<0.001	47953	0.52
pro	E. coli O127:H6 str. E2348/69	NC_011601	Sak	Abc2	2	2.864	0.91	45027	0.5
pro	E. coli O83:H1 str. NRG 857C	CP001855	ERF	Abc2	0	1.907	0.3	40323	0.47
pro	E. coli LF82	CU651637	RedB	-	0	1.845	0.32	38209	0.47
pro	E. coli O157:H7 str. Sakai	NC_002695	RedB	Gam	1	3.406	0.29	62143	0.5
pro	E. coli O157:H7 EDL933	NC_002655	RedB	Gam	1	3.228	0.34	61685	0.49
pro	E. coli ED1a	NC_011745	RedB	Gam	1	3.318	0.31	62335	0.5
pro	E. coli O26:H11 str. 11368	NC_013361	Sak4	Abc2	2	3.422	0.67	55379	0.5
pro	E. coli O111:H- str. 11128	NC_013364	ERF	Abc2	1	3.130	0.36	60035	0.5
pro	E. coli ABU 83972	CP001671	-	-	16	4.404	<0.0001	51832	0.52
pro	S. typhimurium LT2	NC_003197	-	-	12	2.901	<0.0001	41660	0.52
pro	E. coli O157:H7 str. Sakai	NC_002695	-	-	9	3.011	<0.001	48217	0.49
pro	E. coli O157:H7 EDL933	NC_002655	-	-	9	2.803	<0.001	46764	0.49
pro	E. coli CFT073	NC_004431	-	-	11	3.414	<0.001	44807	0.51
pro	E. coli UMN026	NC_011751	-	-	10	3.707	<0.001	47950	0.51
pro	E. coli O157:H7 str. EC4115	NC_011353	-	-	7	2.744	<0.001	45221	0.49
pro	E. coli O127:H6 str. E2348/69	NC_011601	-	-	8	2.415	<0.001	39446	0.49
pro	E. coli O26:H11 str. 11368	NC_013361	-	-	9	4.113	<0.001	49344	0.53
pro	E. coli O157:H7 str. TW14359	NC_013008	-	-	7	2.744	<0.001	45221	0.49
pro	E. coli O111:H- str. 11128	NC_013364	-	-	13	3.492	<0.0001	57160	0.5
pro	E. coli O103:H2 str. 12009	NC_013353	-	-	9	3.438	<0.001	51352	0.5
pro	E. coli UMNK88	CP002729	-	-	19	2.939	<0.0001	40285	0.51
pro	E. coli ETEC H10407	FN649414	-	-	16	3.669	<0.0001	46657	0.52
pro	E. coli O157:H7 str. Sakai	NC_002695	-	-	1	3.165	0.35	47183	0.51
pro	E. coli O157:H7 EDL933	NC_002655	-	-	1	3.519	0.27	54616	0.51
pro	E. coli CFT073	NC_004431	RedB	Gam	0	3.205	0.08	48665	0.51
pro	E. coli UTI89	NC_007946	RedB	Gam	0	2.720	0.13	41108	0.5
pro	E. coli 536	NC_008253	RedB	Gam	0	2.868	0.11	41106	0.51
pro	E. coli APEC O1	NC_008563	RedB	Gam	0	2.668	0.14	41016	0.5
pro	E. coli UMN026	NC_011751	RedB	Gam	0	2.731	0.13	38304	0.51
pro	E. coli S88	NC_011742	RedB	Gam	0	2.659	0.14	41040	0.5
pro	E. coli O157:H7 str. EC4115	NC_011353	-	-	1	3.179	0.35	47179	0.5
pro	E. coli O157:H7 str. TW14359	NC_013008	-	-	1	3.038	0.39	45865	0.5
pro	E. coli SE15 DNA	AP009378	RedB	Gam	0	2.797	0.12	43770	0.5
pro	E. coli ABU 83972	CP001671	RedB	Gam	0	2.833	0.12	43620	0.5
pro	E. coli O83:H1 str. NRG 857C	CP001855	RedB	Gam	4	3.251	0.82	54725	0.49
pro	E. coli IHE3034	CP001969	RedB	Gam	0	2.676	0.14	41139	0.5
pro	E. coli UM146	CP002167	RedB	Gam	0	2.594	0.15	38988	0.51
pro	E. coli NA114	CP002797	RedB	Gam	1	2.193	0.71	30069	0.52
pro	E. coli NA114	CP002797	-	-	5	4.647	0.99	47621	0.54
pro	S. enterica subsp. enterica serovar Typhi str. CT18	NC_003198	RedB	Gam	14	3.285	<0.0001	44009	0.5
pro	S. enterica subsp. enterica serovar Typhi Ty2	NC_004631	RedB	Gam	18	3.242	<0.0001	44273	0.5
pro	S. enterica subsp. enterica serovar Choleraesuis str. SC-B67	NC_006905	RedB	-	9	2.788	<0.001	40886	0.51
pro	S. enterica subsp. enterica serovar Newport str. SL254	NC_011080	RedB	-	12	3.171	<0.0001	45473	0.51
pro	S. enterica subsp. enterica serovar Heidelberg str. SL476	NC_011083	RedB	Gam	14	3.242	<0.0001	45341	0.51
pro	S. enterica subsp. enterica serovar Dublin str. CT_02021853	NC_011205	RedB	-	11	2.852	<0.0001	44007	0.51
pro	S. enterica subsp. enterica serovar Paratyphi C strain RKS4594	NC_012125	RedB	-	16	3.126	<0.0001	45069	0.5
pro	S. enterica subsp. enterica serovar Typhimurium str. D23580	FN424405	RedB	-	12	3.211	<0.0001	45777	0.51
pro	S. enterica subsp. enterica serovar Typhimurium str. T000240	AP011957	RedB	-	12	3.190	<0.0001	45514	0.51
pro	S. enterica subsp. enterica serovar Paratyphi C strain RKS4594	NC_012125	RedB	-	11	3.157	<0.0001	44358	0.51
pro	S. bongori NCTC 12419	NC_015761	-	-	8	1.630	<0.0001	37787	0.47
pro	S. enterica subsp. enterica serovar Newport str. SL254	NC_011080	-	-	16	2.898	<0.0001	42401	0.5
pro	E. coli O111:H- str. 11128	NC_013364	-	-	14	3.661	<0.0001	41446	0.53
pro	E. coli O111:H- str. 11128	NC_013364	-	-	4	2.811	0.62	45166	0.51
pro	E. coli O157:H7 str. Sakai	NC_002695	-	-	9	3.344	<0.001	54719	0.51
pro	E. coli O157:H7 EDL933	NC_002655	-	-	14	3.764	<0.0001	51869	0.52
pro	E. coli UTI89	NC_007946	-	-	16	3.654	<0.0001	46605	0.51
pro	E. coli APEC O1	NC_008563	-	-	16	3.606	<0.0001	45996	0.51
pro	E. coli 55989	NC_011748	-	-	7	3.384	0.11	49429	0.5
pro	E. coli ED1a	NC_011745	-	-	10	3.021	<0.001	40793	0.53
pro	E. coli O157:H7 str. EC4115	NC_011353	-	-	16	3.808	<0.0001	45377	0.53
pro	E. coli O157:H7 str. EC4115	NC_011353	-	-	9	3.286	<0.001	58226	0.5
pro	E. coli E24377A	NC_009801	-	-	11	1.402	<0.0001	30521	0.48
pro	E. coli O127:H6 str. E2348/69	NC_011601	-	-	8	3.539	0.06	55456	0.51
pro	E. coli O26:H11 str. 11368	NC_013361	-	-	5	1.481	<0.001	33448	0.46
pro	E. coli O157:H7 str. TW14359	NC_013008	-	-	15	3.752	<0.0001	43957	0.53
pro	E. coli O157:H7 str. TW14359	NC_013008	-	-	9	3.331	<0.001	59403	0.5
pro	E. coli O103:H2 str. 12009	NC_013353	-	-	11	3.601	<0.001	42907	0.53
pro	E. coli 042 complete genome.	FN554766	-	-	16	4.104	<0.0001	52726	0.51
pro	E. coli O55:H7 str. CB9615	NC_013941	-	-	4	3.595	0.97	53130	0.51
pro	E. coli IHE3034	CP001969	-	-	16	3.594	<0.0001	46319	0.51
pro	E. coli UM146	CP002167	-	-	16	3.581	<0.0001	45921	0.51
pro	E. coli O157:H7 EDL933	NC_002655	-	-	6	3.674	0.33	47224	0.52
pro	S. enterica subsp. enterica serovar Dublin str. CT_02021853	NC_011205	-	-	17	3.072	<0.0001	44722	0.5
pro	S. enterica subsp. enterica serovar Enteritidis str. P125109	NC_011294	-	-	17	2.893	<0.0001	44536	0.5
pro	E. coli UMNK88	CP002729	ERF	Abc2	7	1.929	<0.001	55561	0.46
pro	E. coli O157:H7 str. Sakai	NC_002695	RedB	-	1	3.394	0.3	50656	0.51
pro	E. coli O157:H7 EDL933	NC_002655	RedB	-	3	3.050	0.73	49341	0.5
pro	E. coli APEC O1	NC_008563	RedB	-	5	2.777	0.3	52636	0.47
pro	E. coli SE11	NC_011415	RedB	-	3	2.598	0.96	52484	0.47
pro	E. coli O26:H11 str. 11368	NC_013361	RedB	-	5	3.583	0.58	46789	0.52
pro	E. coli O111:H- str. 11128	NC_013364	-	-	2	2.528	0.93	30487	0.54
pro	E. coli 042 complete genome.	FN554766	RedB	-	5	2.822	0.31	46278	0.48
pro	E. coli O55:H7 str. CB9615	NC_013941	RedB	-	3	3.156	0.78	44061	0.51
pro	E. coli UMNF18	CP002890	RedB	-	7	2.350	<0.001	47572	0.48
pro	E. coli W	CP002185	RedB	-	9	2.622	<0.001	48857	0.48
pro	E. coli O157:H7 str. Sakai	NC_002695	-	-	12	3.616	<0.0001	45601	0.52
pro	E. coli O157:H7 str. Sakai	NC_002695	-	-	7	4.122	0.25	50142	0.53
pro	E. coli UMN026	NC_011751	-	-	9	2.896	<0.001	44388	0.49
pro	E. coli 55989	NC_011748	-	-	13	3.368	<0.0001	45013	0.5
pro	E. coli ED1a	NC_011745	-	-	12	4.220	<0.001	58392	0.52
pro	E. coli IAI1	NC_011741	-	-	7	3.039	0.07	47142	0.5
pro	E. coli O157:H7 str. EC4115	NC_011353	-	-	10	3.561	<0.001	43130	0.52
pro	E. coli O157:H7 str. EC4115	NC_011353	-	-	6	3.517	0.29	44953	0.53
pro	E. coli ATCC 8739	NC_010468	-	-	7	3.035	0.07	47012	0.5
pro	E. coli SE11	NC_011415	-	-	12	3.843	<0.001	46490	0.52
pro	E. coli O26:H11 str. 11368	NC_013361	-	-	6	3.572	0.3	46793	0.52
pro	E. coli O26:H11 str. 11368	NC_013361	-	-	8	3.124	<0.001	48920	0.5
pro	E. coli O157:H7 str. TW14359	NC_013008	-	-	8	3.251	<0.001	38639	0.52
pro	E. coli O157:H7 str. TW14359	NC_013008	-	-	6	3.522	0.29	44953	0.53
pro	E. coli 042 complete genome.	FN554766	-	-	7	2.999	0.07	45533	0.51
pro	E. coli O55:H7 str. CB9615 chromosome	NC_013941	-	-	14	3.570	<0.0001	46680	0.52
pro	E. coli UMNK88	CP002729	-	-	7	3.022	0.07	46510	0.5
pro	E. coli O83:H1 str. NRG 857C	CP001855	-	-	6	2.686	0.11	43781	0.49
pro	E. coli LF82 chromosome	CU651637	-	-	11	2.780	<0.0001	45562	0.48
pro	E. coli KO11	CP002516	-	-	7	3.000	0.07	45166	0.51
pro	E. coli IAI39	NC_011750	-	-	3	1.821	0.55	31803	0.49
pro	S. enterica subsp. enterica serovar Choleraesuis str. SC-B67	NC_006905	-	-	16	3.791	<0.0001	50239	0.51
pro	S. enterica subsp. enterica serovar Paratyphi B str. SPB7	NC_010102	RedB	-	11	2.896	<0.0001	36672	0.52
pro	S. enterica subsp. enterica serovar Paratyphi B str. SPB7	NC_010102	RedB	-	15	2.892	<0.0001	43776	0.5
pro	S. enterica subsp. enterica serovar Typhimurium str. 14028S	CP001363	RedB	-	9	3.565	<0.001	55059	0.51
pro	E. coli O26:H11 str. 11368	NC_013361	RedB	-	8	3.662	0.07	48518	0.52
pro	E. coli ED1a	NC_011745	-	-	17	3.992	<0.0001	50148	0.53
pro	E. coli SE11	NC_011415	-	-	11	3.703	<0.001	44793	0.52
pro	E. coli O111:H- str. 11128	NC_013364	-	-	15	3.661	<0.0001	48058	0.52
pro	E. coli O103:H2 str. 12009	NC_013353	-	-	12	3.580	<0.0001	51245	0.51
pro	E. coli UMNF18	CP002890	-	-	14	2.779	<0.0001	40540	0.5
pro	E. coli O157:H7 str. Sakai	NC_002695	-	-	9	3.429	<0.001	44524	0.52
pro	E. coli O157:H7 EDL933	NC_002655	-	-	9	3.687	<0.001	45126	0.52
pro	E. coli APEC O1	NC_008563	-	-	14	2.529	<0.0001	40497	0.49
pro	E. coli O157:H7 str. EC4115	NC_011353	-	-	9	3.523	<0.001	43470	0.52
pro	E. coli SMS-3-5	NC_010498	-	-	14	3.121	<0.0001	41970	0.51
pro	E. coli O157:H7 str. TW14359	NC_013008	-	-	9	3.490	<0.001	44036	0.52
pro	E. coli O111:H- str. 11128	NC_013364	-	-	12	3.945	<0.001	47189	0.52
pro	E. coli O103:H2 str. 12009	NC_013353	-	-	13	3.844	<0.0001	47782	0.52
pro	E. coli O103:H2 str. 12009	NC_013353	-	-	10	3.380	<0.001	50468	0.5
pro	E. coli O103:H2 str. 12009	NC_013353	-	-	8	4.364	0.15	52290	0.52
pro	E. coli 042 complete genome.	FN554766	-	-	27	3.916	<0.0001	57008	0.5
pro	E. coli O55:H7 str. CB9615 chromosome	NC_013941	-	-	9	3.583	<0.001	49444	0.5
pro	E. coli IHE3034	CP001969	-	-	12	2.810	<0.0001	41416	0.5
pro	E. coli O157:H7 str. EC4115	NC_011353	RedB	Gam	0	3.785	<0.001	57316	0.51
pro	E. coli O157:H7 str. TW14359	NC_013008	RedB	Gam	0	3.788	<0.001	57082	0.51
pro	E. coli O111:H- str. 11128	NC_013364	ERF	Abc2	0	2.260	0.21	41920	0.47
pro	E. fergusonii ATCC 35469	NC_011740	ERF	Abc2	0	1.935	0.29	40278	0.46
pro	E. coli O157:H7 str. Sakai	NC_002695	RedB	-	5	3.350	0.49	47597	0.52
pro	E. coli O157:H7 EDL933	NC_002655	RedB	Gam	3	3.472	0.91	48633	0.52
pro	E. coli ED1a	NC_011745	RedB	Gam	5	4.275	0.85	62584	0.51
pro	E. coli O157:H7 str. EC4115	NC_011353	-	-	13	3.705	<0.0001	43862	0.53
pro	E. coli O157:H7 str. EC4115	NC_011353	RedB	Gam	7	3.439	0.12	49981	0.51
pro	E. coli O157:H7 str. TW14359	NC_013008	RedB	Gam	4	3.359	0.87	48039	0.51
pro	E. coli O26:H11 str. 11368	NC_013361	RedB	Gam	1	3.058	0.38	49096	0.5
pro	S. enterica subsp. enterica serovar Typhi str. CT18	NC_003198	RedB	-	14	2.605	<0.0001	46675	0.48
pro	S. enterica subsp. enterica serovar Dublin str. CT_02021853	NC_011205	RedB	-	9	3.147	<0.001	45498	0.51
pro	S. enterica subsp. enterica serovar Gallinarum str. 287/91	NC_011274	RedB	-	10	3.507	<0.001	54933	0.5
pro	E. coli UTI89	NC_007946	ERF	Abc2	0	1.593	0.41	40279	0.47
pro	E. coli APEC O1	NC_008563	ERF	Abc2	0	1.592	0.41	39731	0.47
pro	E. coli 55989	NC_011748	ERF	Abc2	0	1.699	0.37	40184	0.46
pro	E. coli S88	NC_011742	ERF	Abc2	0	1.618	0.4	40052	0.47
pro	E. coli O157:H7 str. EC4115	NC_011353	RedB	Gam	2	2.925	0.88	53473	0.49
pro	E. coli O127:H6 str. E2348/69	NC_011601	Sak	Abc2	12	2.636	<0.0001	43101	0.49
pro	E. coli O26:H11 str. 11368	NC_013361	ERF	Abc2	0	1.886	0.3	40415	0.46
pro	E. coli O157:H7 str. TW14359	NC_013008	RedB	Gam	2	3.534	0.63	61917	0.49
pro	E. coli O103:H2 str. 12009	NC_013353	RedB	Gam	1	3.304	0.32	62346	0.5
pro	E. coli UMNK88	CP002729	ERF	Abc2	0	1.934	0.29	41665	0.47
pro	E. coli W	CP002185	Sak	Abc2	0	2.172	0.23	39164	0.47
pro	S. enterica subsp. enterica serovar Typhimurium str. 14028S	CP001363	-	-	20	3.143	<0.0001	39705	0.51
pro	S. enterica subsp. enterica serovar Typhimurium str. 4/74	CP002487	-	-	20	3.131	<0.0001	39272	0.51
pro	S. enterica subsp. enterica serovar Paratyphi B str. SPB7	NC_010102	RedB	Gam	10	2.975	<0.001	42213	0.5
pro	S. enterica subsp. enterica serovar Schwarzengrund str. CVM19633	NC_011094	RedB	-	10	2.951	<0.001	37790	0.51
pro	E. coli IAI1	NC_011741	Gp2.5	-	17	2.830	<0.0001	41890	0.49
pro	E. coli O103:H2 str. 12009	NC_013353	Gp2.5	-	16	3.035	<0.0001	42237	0.5
pro	E. coli O55:H7 str. CB9615 chromosome	NC_013941	Gp2.5	-	16	2.827	<0.0001	40458	0.49
pro	E. coli ETEC H10407	FN649414	Gp2.5	-	16	3.022	<0.0001	41933	0.5
pro	E. coli O157:H7 str. Sakai	NC_002695	-	-	1	1.155	0.64	30963	0.43
pro	E. coli CFT073	NC_004431	-	-	7	3.032	0.07	47808	0.49
pro	E. coli UTI89	NC_007946	-	-	13	2.703	<0.0001	43168	0.49
pro	E. coli O26:H11 str. 11368	NC_013361	-	-	11	3.618	<0.001	54454	0.5
pro	E. coli O157:H7 str. TW14359	NC_013008	-	-	1	1.154	0.64	31599	0.42
pro	E. coli O111:H- str. 11128	NC_013364	-	-	5	2.132	0.13	34281	0.51
pro	E. coli O55:H7 str. CB9615 chromosome	NC_013941	RedB	-	3	3.826	0.94	55848	0.51
pro	E. coli UMNK88	CP002729	-	-	21	3.400	<0.0001	36141	0.52
pro	E. coli IHE3034	CP001969	-	-	13	2.682	<0.0001	40499	0.5
pro	E. coli UM146	CP002167	-	-	13	2.710	<0.0001	42785	0.49
pro	S. enterica subsp. enterica serovar Paratyphi C strain RKS4594	NC_012125	Sak	Abc2	0	1.927	0.29	38027	0.47
pro	S. typhimurium LT2	NC_003197	RedB	-	8	3.308	<0.001	47841	0.51
pro	S. enterica subsp. enterica serovar Choleraesuis str. SC-B67	NC_006905	RedB	-	16	3.096	<0.0001	44283	0.5
pro	S. enterica subsp. enterica serovar Newport str. SL254	NC_011080	RedB	-	8	3.228	<0.001	50099	0.51
pro	S. enterica subsp. enterica serovar Typhimurium str. T000240 DNA	AP011957	RedB	-	8	3.290	<0.001	47792	0.51
pro	S. enterica subsp. enterica serovar Typhimurium str. 14028S	CP001363	RedB	-	8	3.232	<0.001	50122	0.51
pro	S. enterica subsp. enterica serovar Typhimurium str. 4/74	CP002487	RedB	-	9	3.548	<0.001	50537	0.51
pro	E. coli BW2952	NC_012759	RedB	Gam	0	2.873	0.11	42636	0.51
pro	E. coli O111:H- str. 11128	NC_013364	-	-	6	3.069	0.18	42630	0.52
pro	E. coli ETEC H10407	FN649414	-	-	19	2.890	<0.0001	40903	0.5
pro	E. coli IAI39	NC_011750	-	-	20	3.794	<0.0001	47445	0.5
pro	E. coli UTI89	NC_007946	-	-	18	3.537	<0.0001	45733	0.5
pro	E. coli S88	NC_011742	-	-	13	3.225	<0.0001	45767	0.49
pro	E. coli O103:H2 str. 12009	NC_013353	RedB	Gam	3	3.283	0.83	53690	0.5
pro	E. coli O55:H7 str. CB9615 chromosome	NC_013941	-	-	10	3.535	<0.001	48881	0.5
pro	E. coli IHE3034	CP001969	-	-	16	3.151	<0.0001	43975	0.5
pro	E. coli ETEC H10407	FN649414	-	-	17	4.457	<0.0001	49595	0.53
pro	E. fergusonii ATCC 35469	NC_011740	-	-	11	3.095	<0.0001	43984	0.5
pro	S. enterica subsp. enterica serovar Schwarzengrund str. CVM19633	NC_011094	-	-	16	2.741	<0.0001	39698	0.5
ph	-	NC_000902	RedB	Gam	1	3.306	0.32	60942	0.5
ph	-	NC_000924	RedB	Gam	1	3.222	0.34	61670	0.49
ph	-	NC_001416	RedB	Gam	0	2.703	0.13	48502	0.5
ph	-	NC_001901	-	-	2	3.443	0.66	46375	0.51
ph	-	NC_002166	ERF	Abc2	2	2.545	0.94	40751	0.49
ph	-	NC_002167	ERF	Abc2	4	2.591	0.52	39732	0.5
ph	-	NC_002371	ERF	Abc2	0	1.867	0.31	41724	0.47
ph	-	NC_002730	Sak4	Abc2	1	2.028	0.8	38297	0.47
ph	-	NC_003356	-	-	17	2.761	<0.0001	42575	0.49
ph	-	NC_003444	-	-	22	2.950	<0.0001	37074	0.51
ph	-	NC_003525	RedB	Gam	1	3.253	0.33	61765	0.49
ph	-	NC_004313	-	-	20	3.113	<0.0001	40149	0.51
ph	-	NC_004348	Sak	Abc2	0	1.936	0.29	40679	0.48
ph	-	NC_004813	RedB	Gam	3	3.749	0.97	57930	0.51
ph	-	NC_004913	RedB	Gam	2	3.206	0.76	59866	0.5
ph	-	NC_004914	RedB	Gam	1	3.417	0.29	62706	0.5
ph	-	NC_005069	-	-	0	2.305	0.2	46339	0.45
ph	-	NC_005344	Sak	Abc2	0	2.246	0.21	39043	0.47
ph	-	NC_005841	Sak	Abc2	0	1.929	0.29	41391	0.47
ph	-	NC_005857	-	-	3	4.151	0.81	51601	0.51
ph	-	NC_006949	Sak	Abc2	1	2.866	0.44	46900	0.49
ph	-	NC_008464	RedB	Gam	1	3.253	0.33	60238	0.49
ph	-	NC_009514	-	-	17	3.200	<0.0001	47021	0.49
ph	-	NC_010237	RedB	Gam	1	3.340	0.31	63395	0.5
ph	-	NC_010391	-	-	12	2.855	<0.0001	42723	0.52
ph	-	NC_010392	RedB	no	8	3.307	<0.001	48491	0.51
ph	-	NC_010393	RedB	no	12	3.183	<0.0001	45840	0.51
ph	-	NC_011356	RedB	Gam	2	3.566	0.62	54896	0.51
ph	-	NC_011357	RedB	Gam	0	4.075	<0.001	62147	0.51
ph	-	NC_011551	Gp2.5	-	0	0.993	0.74	39867	0.43
ph	-	NC_011802	Sak	Abc2	0	1.924	0.29	41941	0.47
ph	-	NC_011976	Sak	Abc2	0	2.145	0.23	43016	0.47
ph	-	NC_013059	Sak	Abc2	0	1.924	0.29	40975	0.47
ph	-	AB426868	ERF	Abc2	0	1.840	0.32	41660	0.47
ph	-	CP000711	ERF	Abc2	0	1.581	0.41	40207	0.47
ph	-	EU078592	RedB	Gam	0	2.904	0.11	42925	0.52
ph	-	FM180578	RedB	Gam	0	3.727	<0.001	57248	0.51
ph	-	GU573886	Sak	Abc2	0	1.991	0.27	40986	0.47
